# Supplementary material for: Comparative Study of the Potentially Toxic Elements and Essential Microelements in Honey Depending on the Geographic Origin
Source: MDPI journal article supplement (doi:10.3390/molecules27175474), 2022-08-26
Supplement: s1 [file s1]

**Supplementary Table S1.** The detailed composition in PTEs of each analysed samples including number of sample, origin and type of honey (mean contents given in unit µg/kg; n = 3)

| Sample | Origin<br>Country/Province    | Type        | As 75  | Be 9  | Co 59 | Cr 52  | Cu 63 | Fe 56 | Mg 24 | Mn 55  | Mo 98  | Ni 60 | Sb 121 | V 51   | Zn 66   |
|--------|-------------------------------|-------------|--------|-------|-------|--------|-------|-------|-------|--------|--------|-------|--------|--------|---------|
| 01     | Poland/Lesser<br>Poland       | buckwheat   | < LOD  | < LOD | 0.976 | 0.1596 | 262.0 | 1112  | 4380  | 1258.0 | 0.2440 | 1.666 | 0430   | 0426   | 614000  |
| 02     | Poland/Holy Cross<br>Province | buckwheat   | < LOD  | < LOD | 0.384 | < LOD  | 296.0 | 1024  | 6820  | 1544.0 | 0.1306 | 4.600 | 0006   | 0558   | 576000  |
| 03     | Poland/Warmian-<br>Masurian   | buckwheat   | 0.4300 | < LOD | 0.328 | 3.760  | 248.0 | 1256  | 5280  | 672.0  | 0.3500 | 5.780 | 0.2140 | 0.1184 | 502000  |
| 04     | Poland/Lesser<br>Poland       | multifloral | < LOD  | < LOD | 0.294 | 0.131  | 11.42 | 802   | 5080  | 145.2  | 0566   | 1.352 | 0138   | 0160   | 414000  |
| 05     | Poland/Masovia                | multifloral | < LOD  | < LOD | 0.228 | 0.136  | 199.4 | 784   | 7020  | 456.0  | 0.1066 | 360.1 | 0000   | 0296   | 450000  |
| 06     | Poland/Lesser<br>Poland       | honeydew    | 0.2400 | < LOD | 4.900 | 0.428  | 402.0 | 1160  | 14980 | 956.0  | 0.6120 | 167.2 | 0.1206 | 0.2740 | 570000  |
| 07     | Poland/Lesser<br>Poland       | honeydew    | 0.2640 | < LOD | 7.280 | 0.416  | 464.0 | 1056  | 14060 | 844.0  | 0.8160 | 266.0 | 0.1094 | 0.3120 | 482000  |
| 08     | Poland/Kuyavia-<br>Pomerania  | phacelia    | < LOD  | < LOD | 0.832 | 0.268  | 230.0 | 866   | 10580 | 504.0  | 0.2800 | 7.260 | 0000   | 0802   | 534000  |
| 09     | Poland/Lesser<br>Poland       | rapeseed    | < LOD  | < LOD | 0.228 | 0.782  | 6.48  | 632   | 4480  | 49.2   | 0138   | 1.828 | 0000   | 0226   | 252000  |
| 10     | Poland/Lesser<br>Poland       | linden      | < LOD  | < LOD | 0.372 | 0.320  | 19.68 | 756   | 4900  | 264.0  | 0.1612 | 2.860 | 0000   | 0718   | 340000  |
| 11     | Bulgaria                      | sunflower   | < LOD  | < LOD | 1.480 | 0.356  | 177.8 | 844   | 6260  | 120.2  | 0.1378 | 2.940 | 0000   | 0736   | 428000  |
| 12     | Poland/Lesser<br>Poland       | goldenrod   | < LOD  | < LOD | 0.422 | 0.187  | 11.4  | 606   | 4080  | 73.4   | 0.1190 | 1.636 | 0000   | 0240   | 258000  |
| 13     | Poland/Silesia                | goldenrod   | 0.1812 | < LOD | 2.800 | 0.145  | 224.0 | 778   | 9740  | 670.0  | 0.1876 | 20.8  | 0000   | 0964   | 384000  |
| 14     | Poland/Łódź                   | goldenrod   | < LOD  | < LOD | 0.262 | 0.280  | 180.6 | 798   | 6940  | 132.8  | 0.1642 | 1.370 | 0270   | 0.1072 | 296000  |
| 15     | Poland/Łódź                   | goldenrod   | < LOD  | < LOD | 0.846 | 0.560  | 14.21 | 788   | 16080 | 195.0  | 0.4280 | 6.460 | 0000   | 0.3520 | 300000  |
| 16     | Poland/Kuyavia-<br>Pomerania  | rapeseed    | < LOD  | < LOD | 0.250 | < LOD  | 5.18  | 576   | 4240  | 95.6   | 0532   | 0.414 | 0000   | 0170   | 19.2200 |

|    |                          |              |        |       |       |       |        |      |      |        |        |        |        |        |         |
|----|--------------------------|--------------|--------|-------|-------|-------|--------|------|------|--------|--------|--------|--------|--------|---------|
| 17 | Poland/Kuyavia-Pomerania | rapeseed     | < LOD  | < LOD | 0.428 | 0.160 | 14.72  | 724  | 6560 | 82.2   | 0.2180 | 0.958  | 0000   | 0544   | 282000  |
| 18 | Poland/Lower Silesia     | buckwheat    | < LOD  | < LOD | 0.204 | 0.101 | 426.0  | 900  | 4640 | 2100.0 | 0.1162 | 2.180  | 0000   | 0362   | 506000  |
| 19 | Poland/Lublin            | multifloral  | < LOD  | < LOD | 0.496 | 0.145 | 224.0  | 842  | 6340 | 458.0  | 0.2880 | 1.900  | 0000   | 0.1460 | 368000  |
| 20 | Poland/Greater Poland    | sunflower    | < LOD  | < LOD | 0.534 | 0.394 | 12.52  | 808  | 6940 | 64.2   | 0578   | 3.720  | 0000   | 0678   | 342000  |
| 21 | Poland/Greater Poland    | malinowy     | < LOD  | 0.758 | 0.376 | 0.644 | 9.43   | 776  | 6440 | 140.8  | 0.2780 | 1.280  | 0718   | 0130   | 326000  |
| 22 | Portugal                 | rosemary     | < LOD  | 0.101 | 0.248 | 0.110 | 6.51   | 750  | 3580 | 80.8   | 0.1292 | 0.754  | 0.1220 | 0.1002 | 242000  |
| 23 | Portugal (Madera)        | multifloral  | < LOD  | 0.126 | 4.220 | 1.480 | 186.2  | 790  | 9360 | 284.0  | 0.3020 | 19.24  | 0516   | 0.1376 | 336000  |
| 24 | Tasmania                 | bush         | < LOD  | 0.126 | 2.480 | 0.106 | 12.85  | 692  | 4900 | 600.0  | 0670   | 1.760  | 0.1040 | 0554   | 276000  |
| 25 | Tasmania                 | leather tree | < LOD  | 0.758 | 4.600 | 0.516 | 12.92  | 798  | 3780 | 518.0  | 0332   | 2.160  | 0468   | 0302   | 240000  |
| 26 | Tasmania                 | clover       | < LOD  | 0.884 | 0.482 | 0.114 | 6.48   | 952  | 3940 | 290.0  | 0.5920 | 1.274  | 0426   | 0.1262 | 282000  |
| 27 | Poland/Kuyavia-Pomerania | buckwheat    | < LOD  | 0.884 | 0.356 | < LOD | 460.0  | 788  | 5900 | 2080.0 | 0.3680 | 9.20   | 0502   | 0580   | 586000  |
| 28 | Poland/Kuyavia-Pomerania | linden       | 0.980  | 0.758 | 0.372 | 0.114 | 19.58  | 860  | 9280 | 108.8  | 1.5480 | 1.892  | 0.2060 | 0.2660 | 348000  |
| 29 | Poland/Kuyavia-Pomerania | linden       | < LOD  | 0.101 | 0.462 | 0.108 | 18.68  | 1146 | 5780 | 73.0   | 0.4960 | 2.200  | 0548   | 0698   | 394000  |
| 30 | Italy                    | multifloral  | < LOD  | 0.758 | 0.420 | 0.384 | 17.98  | 876  | 6220 | 228.0  | 0782   | 15.400 | 0744   | 0484   | 354000  |
| 31 | Poland/Kuyavia-Pomerania | multifloral  | < LOD  | 0.884 | 0.240 | < LOD | 5.96   | 706  | 4340 | 14.5   | 0.1220 | 0.410  | 0516   | 0154   | 482000  |
| 32 | Poland/Warmian-Masurian  | acacia       | < LOD  | 0.632 | 0.272 | < LOD | 7.64   | 720  | 3980 | 118.0  | 0114   | 3.3600 | 0430   | 0066   | 358000  |
| 33 | Poland/Warmian-Masurian  | linden       | < LOD  | 0.101 | 0.378 | < LOD | 16.70  | 838  | 5120 | 222.0  | 0.1070 | 2400   | 0462   | 0166   | 440000  |
| 34 | Poland/Warmian-Masurian  | buckwheat    | 0.1292 | 0.101 | 0.420 | 0.320 | 218.00 | <LOD | 4880 | 396.0  | 0.1460 | 6200   | 0.2260 | 0648   | 1048000 |
| 35 | Turkey                   | multifloral  | 0.4900 | 0.758 | 0.114 | 0.103 | 2.22   | 13.4 | 2860 | 2800   | 0176   | 0.2220 | 0.2540 | 0490   | 3.9000  |

|    |                         |             |       |       |       |       |       |      |       |        |        |        |        |        |        |
|----|-------------------------|-------------|-------|-------|-------|-------|-------|------|-------|--------|--------|--------|--------|--------|--------|
| 36 | Poland/Lower Silesia    | acacia      | < LOD | 0.884 | 0.174 | < LOD | 4.84  | 722  | 3380  | 13.5   | 0252   | 0.9020 | 0408   | 0008   | 332000 |
| 37 | Romania                 | multifloral | < LOD | 0.101 | 0.414 | 0.552 | 9.34  | 1186 | 5860  | 83.0   | 0.1154 | 1.8900 | 0.2420 | 0510   | 318000 |
| 38 | Romania                 | rapeseed    | < LOD | 0.884 | 0.202 | < LOD | 12.94 | 772  | 10140 | 14.7   | 0.1126 | 6.7400 | 0438   | 0188   | 392000 |
| 39 | Romania                 | acacia      | < LOD | 0.101 | 0.190 | 0.730 | 5.36  | 714  | 2920  | 15.5   | 0.1118 | 2.5800 | 0444   | 0166   | 288000 |
| 40 | Poland/Lublin           | linden      | < LOD | 0.884 | 0.195 | < LOD | 364.0 | 904  | 3860  | 1708.0 | 0300   | 1.1180 | 0484   | 0188   | 372000 |
| 41 | Poland/Lublin           | multifloral | < LOD | 0.884 | 0.187 | < LOD | 392.0 | 902  | 4200  | 1942.0 | 0238   | 1700   | 0414   | 0140   | 408000 |
| 42 | Poland/Warmian-Masurian | honeydew    | 0.306 | 0.356 | 0.484 | 0.288 | 222.0 | 1070 | 5240  | 442.0  | 0.9020 | 3.4200 | 0468   | 0.1390 | 436000 |
| 43 | Poland/Warmian-Masurian | linden      | 0.486 | 0498  | 0.300 | 0.252 | 230.1 | 820  | 4720  | 402.0  | 0.7360 | 3.7800 | 0396   | 0.2140 | 426000 |
| 44 | Poland/Warmian-Masurian | dandelion   | 0.151 | 0.498 | 1.112 | 1.140 | 220.1 | 912  | 4740  | 94.4   | 5.9400 | 6.2400 | 0.1272 | 0.2540 | 584000 |
| 45 | Germany                 | multifloral | 0.632 | 0.214 | 1.600 | 0.538 | 224.1 | 728  | 4340  | 74.4   | 2000   | 1.3800 | 0.1506 | 0.1656 | 492000 |

**Supplementary Table S2.** Accuracy testing by investigation of certified material (p-Alfaalfa) for selected PTE's ( n = 3)

| No. | Element | Type                                    | Value | Unit | Confidence limit<br>for sign. level<br>( $\alpha$ =0.05) | Obtained<br>value | RSD<br>[%] |
|-----|---------|-----------------------------------------|-------|------|----------------------------------------------------------|-------------------|------------|
| 3   | Cd      | certified                               | 136   | ppb  | 130-143                                                  | 141.6             | 3.5        |
| 5   | Cr      | additional without<br>confidence values | 900   | ppb  | -                                                        | 865               | 4.5        |
| 6   | Cu      | certified                               | 11.7  | ppm  | 10.9-12.4                                                | 10.8              | 2.5        |
| 7   | Fe      | certified                               | 355   | ppm  | 337-373                                                  | 348               | 3.1        |
| 8   | Mg      | certified                               | 0.352 | %    | 0.340-0.365                                              | 0.354             | 5.1        |
| 9   | Mn      | certified                               | 34.2  | ppm  | 33.1-35.4                                                | 35.2              | 3.3        |
| 11  | Ni      | certified                               | 2.54  | ppm  | 2.36-2.72                                                | 2.66              | 3.2        |
| 12  | Pb      | certified                               | 1.84  | ppm  | 1.67-2.01                                                | 1.77              | 2.6        |
| 15  | Zn      | certified                               | 33.2  | ppm  | 32.2-34.2                                                | 34.2              | 5.5        |
